# Supplementary material for: Distinct Microbial Community Performing Dissimilatory Nitrate Reduction to Ammonium (DNRA) in a High C/NO3− Reactor
Source: PubMed Central journal article supplement (PMC6167113; doi:10.1264/jsme2.me17193), 2018-09-29
Supplement: 33_264_s1.pdf [file 33_264_s1.pdf]

Table S1. Glucose and  $\text{NO}_3^-$  supplied to the low and high  $\text{C}/\text{NO}_3^-$  SBRs during the 6-h and 12-h cycle periods

| SBRs                          | COD/ $\text{NO}_3^-$ -<br>N ratio | During 6-h SBR cycle              |                                             | During 12-h SBR cycle             |                                             |
|-------------------------------|-----------------------------------|-----------------------------------|---------------------------------------------|-----------------------------------|---------------------------------------------|
|                               |                                   | Glucose<br>( $\text{mg L}^{-1}$ ) | $\text{NO}_3^-$<br>( $\text{mg-N L}^{-1}$ ) | Glucose<br>( $\text{mg L}^{-1}$ ) | $\text{NO}_3^-$<br>( $\text{mg-N L}^{-1}$ ) |
| Low $\text{C}/\text{NO}_3^-$  | 4/1                               | 400                               | 100                                         | 800                               | 200                                         |
| High $\text{C}/\text{NO}_3^-$ | 8/1                               | 800                               | 100                                         | 1,600                             | 200                                         |

Table S2. Microbial community richness (Chao1 index) and biodiversity (Shannon index) of the samples taken from the inoculum and the low and high  $\text{C}/\text{NO}_3^-$  SBRs

| Index   | Inoculum | L27    | L30    | L38    | L42    | L48    | H27    | H30    | H38    | H42    | H48    |
|---------|----------|--------|--------|--------|--------|--------|--------|--------|--------|--------|--------|
| Chao1   | 3688.6   | 4288.4 | 4720.5 | 4772.0 | 4978.1 | 5024.6 | 3872.5 | 3533.4 | 2855.1 | 2401.4 | 3157.5 |
| Shannon | 8.10     | 7.84   | 7.78   | 7.86   | 7.98   | 7.90   | 5.30   | 5.48   | 4.57   | 4.48   | 5.70   |

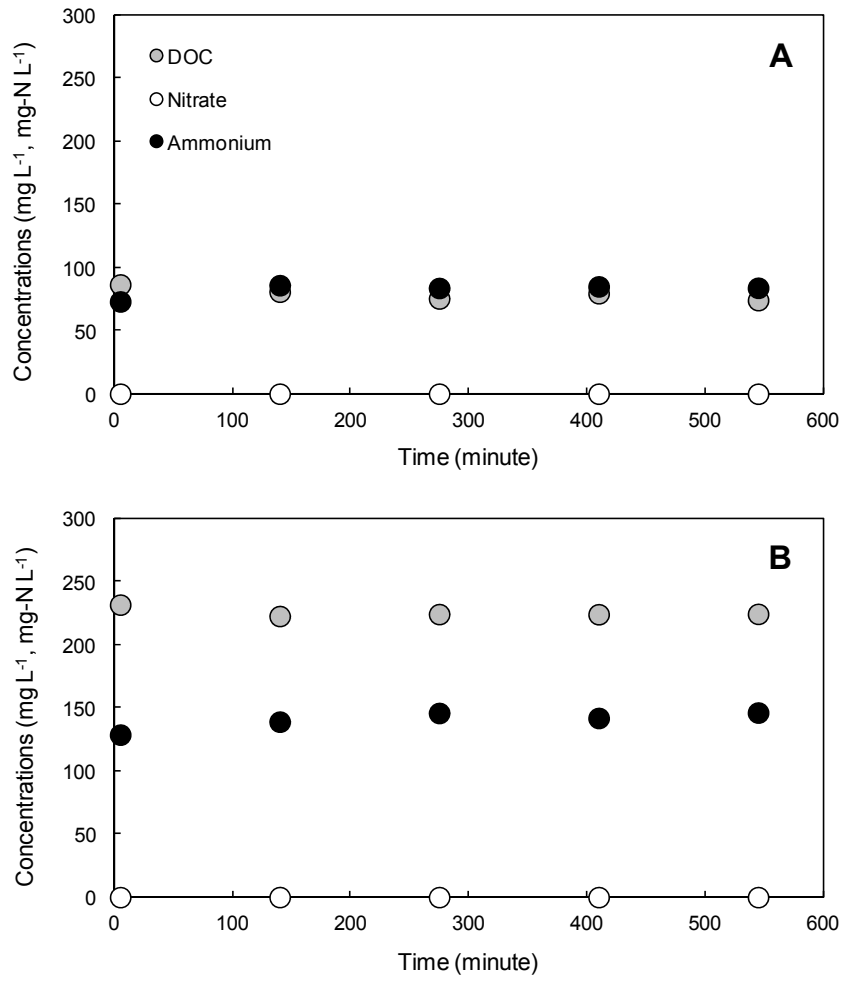

Fig. S1. Stable NO<sub>3</sub><sup>-</sup>, NH<sub>4</sub><sup>+</sup> and DOC concentrations observed during one cycle of the (A) low and (B) high C/NO<sub>3</sub><sup>-</sup> SBRs (on day 20)

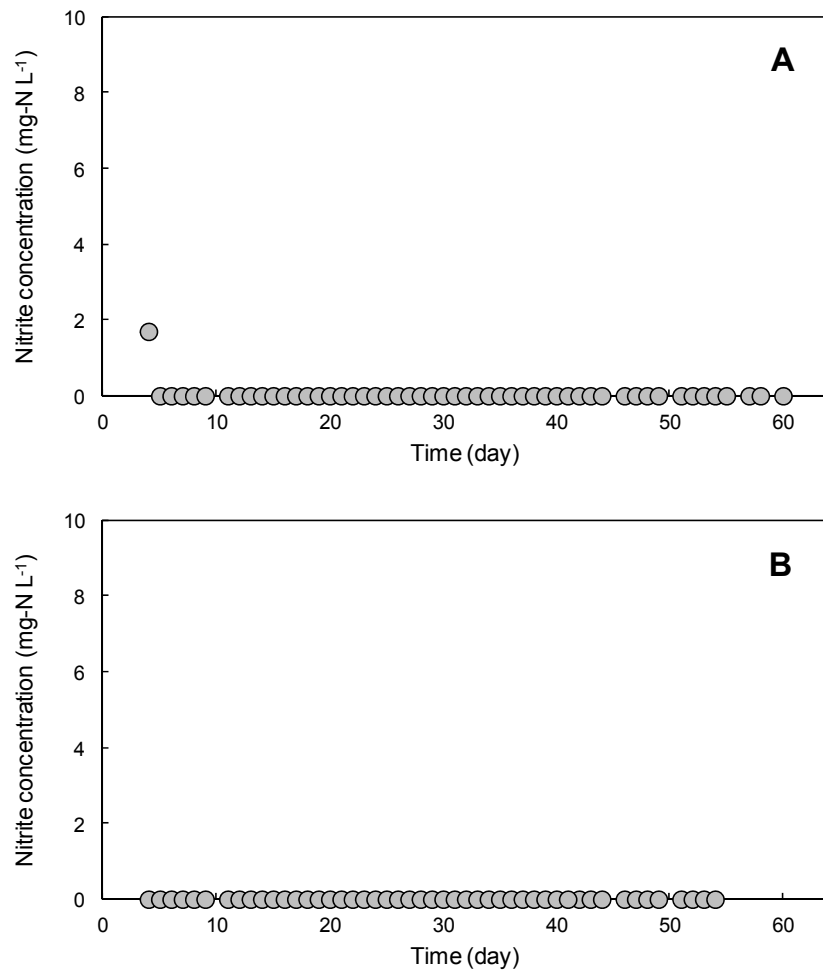

Fig. S2. NO<sub>2</sub><sup>-</sup> concentrations measured in the (A) low and (B) high C/NO<sub>3</sub><sup>-</sup> SBRs

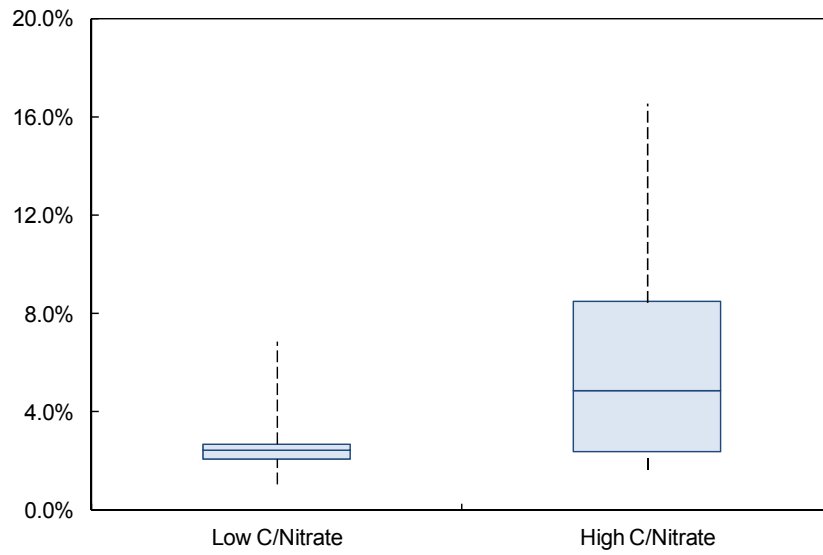

Fig. S3. Box plot depicting variation in relative abundances of the major OTUs in the low and high  $C/NO_3^-$  sludge samples

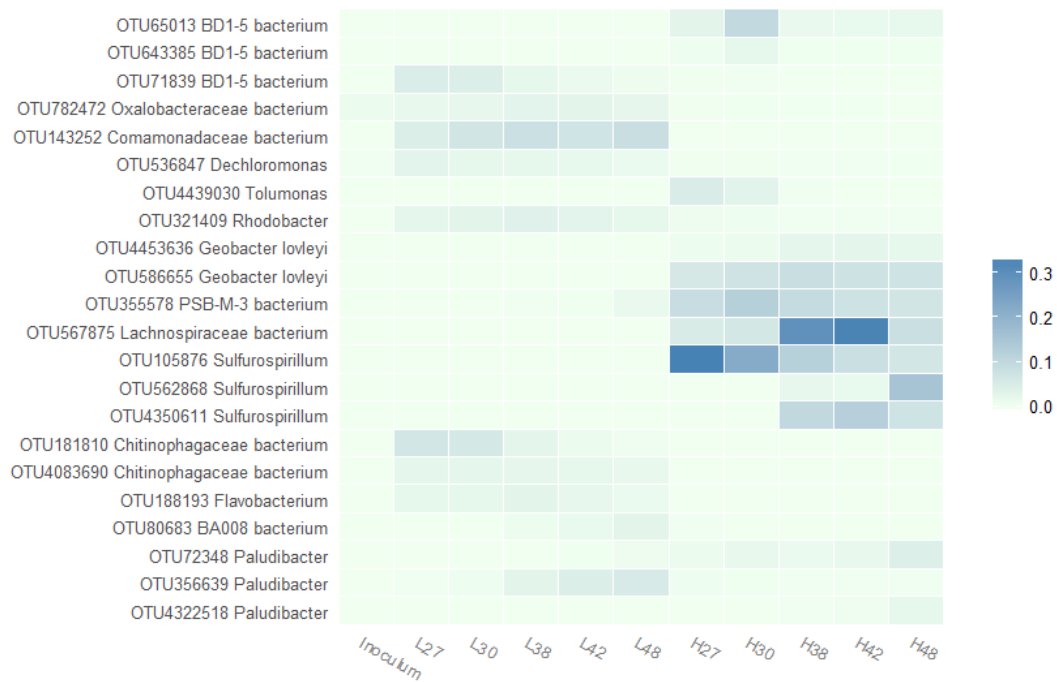

Fig. S4. Heatmap showing relative abundances of the top 22 OTUs in the inoculum, the low  $C/NO_3^-$  (L27, L30, L38, L42 and L48) and the high  $C/NO_3^-$  (H27, H30, H38, H42 and H48) SBRs (the scale is in a range 0.0 to 1.0)

*Calculation on the sulfide-driven DNRA*

DNRA pathway with sulfide as an electron donor can be described as follows,

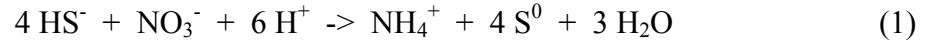

The DNRA reaction requires four moles of sulfide per one mole of  $\text{NO}_3^-$ . Therefore, if all the supplied  $\text{SO}_4^{2-}$  ( $24.6 \pm 0.66 \text{ mg-S}^{2-} \text{ L}^{-1}$ ) was to be reduced to sulfide,  $2.69 \pm 0.07 \text{ mg-N L}^{-1}$  of  $\text{NO}_3^-$  would be used by the sulfide-driven DNRA reaction, which is equal to 1.35% of the  $\text{NO}_3^-$  added ( $200 \text{ mg-N L}^{-1}$ ). The DNRA pathway that could be induced by sulfide hence should be negligible considering the portion of  $\text{NO}_3^-$  that could be utilized by the process.
